# Supplementary material
Source: PubMed Central journal article supplement (PMC7960439)
Supplement: 16-01058.pdf [file 16-01058.pdf]

**On-line Table: Summary of major inherited diseases with dentate nucleus involvement**

| Disease                   | Incidence   | Genetic Mutation             | Inheritance Pattern                 | Classic Clinical Syndrome                                              | Dentate Appearance (CT/MRI)                                                                                                                                                                | Other Areas Affected                                                                                                        |
|---------------------------|-------------|------------------------------|-------------------------------------|------------------------------------------------------------------------|--------------------------------------------------------------------------------------------------------------------------------------------------------------------------------------------|-----------------------------------------------------------------------------------------------------------------------------|
| NBIA                      | 1/1,000,000 | 10 types                     | 8 AR<br>1 AD<br>1 X-linked dominant | Extrapyramidal abnormalities and cognitive dysfunction                 | CT: NA<br>MRI: iron deposition visualized as hypointensity on SWI/T2*GRE and T2WI                                                                                                          | Iron deposition in the basal ganglia, thalami, substantia nigra                                                             |
| Fahr disease              | 1/1,000,000 | SLC20A2, PDGFRB, PDGFB, XPR1 | AD or AR                            | Progressive extrapyramidal symptoms and cognitive impairment           | CT: dense symmetric calcification<br>MRI: mineralization will be hypointense on SWI/T2*GRE and T2WI; variable to hyperintense on T1WI depending on stage of disease and calcium metabolism | Dense calcification in the basal ganglia, thalamus, subcortical white matter                                                |
| Leigh disease             | 1/50,000    | SURFT                        | AR or X-linked                      | Developmental delay and regression                                     | CT: Low attenuation<br>MRI: hyperintensity on T2WI with diffusion restriction<br>MRS: elevated choline and lactate levels                                                                  | T2 hyperintensity and restricted diffusion of basal ganglia, thalamus, periaqueductal gray, substantia nigra, pons, medulla |
| Friedreich ataxia         | 2/100,000   | FXN                          | AR                                  | Progressive gait ataxia                                                | CT/MRI: no visible abnormalities                                                                                                                                                           | Wallerian degeneration of the SCP; thinning of the cervical spinal cord                                                     |
| Canavan disease           | 1/100,000   | ASPA                         | AR                                  | Developmental delay, poor muscle tone                                  | CT: low attenuation<br>MRI: T2 hyperintensity and diffusion restriction<br>MRS: elevated NAA                                                                                               | Diffuse atrophy and white matter changes; sparing of the putamen; variable involvement of thalamus, brain stem, and pons    |
| Glutaric aciduria type 1  | 1/100,000   | GCDH                         | AR                                  | Rapid neurologic deterioration following febrile illness               | CT: low attenuation<br>MRI: T2 hyperintensity and diffusion restriction                                                                                                                    | Cystlike widening of the Sylvian fissures; frontotemporal atrophy<br>Subdural hematomas and hygromas                        |
| Maple syrup urine disease | 1/185,000   | BCKDHA, BCKDHB, DBT          | AR                                  | Failure to thrive and neurologic decline in the first few days of life | CT: Low attenuation<br>MRI: T2 hyperintensity and diffusion restriction<br>MRS: leucine, isoleucine, and valine                                                                            | Generalized cerebral edema with marked involvement of the 4 DCN, brain stem, cerebral peduncles, and internal capsule       |

**Note:**—NBIA indicates neurodegeneration with brain iron accumulation; NA, not applicable; DCN, deep cerebellar nuclei; AR, autosomal recessive; AD, autosomal dominant; GRE, gradient recalled-echo; SCP, superior cerebellar peduncle.
